# Supplementary material for: Expression Profiling of a Heterogeneous Population of ncRNAs Employing a Mixed DNA/LNA Microarray
Source: Hindawi journal article supplement (doi:10.1155/2012/283560), 2012-01-01
Supplement: f1 [file 283560.f1.pdf]

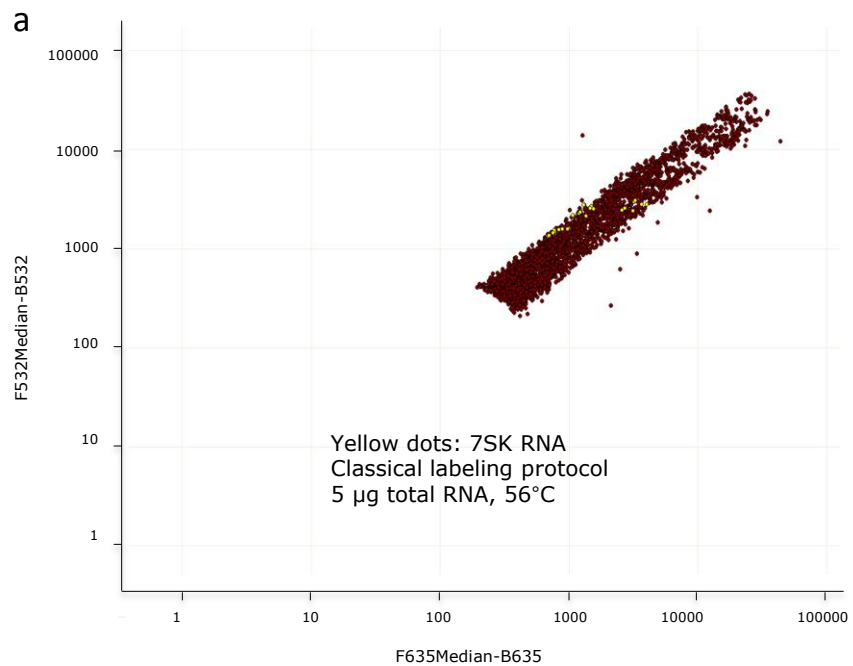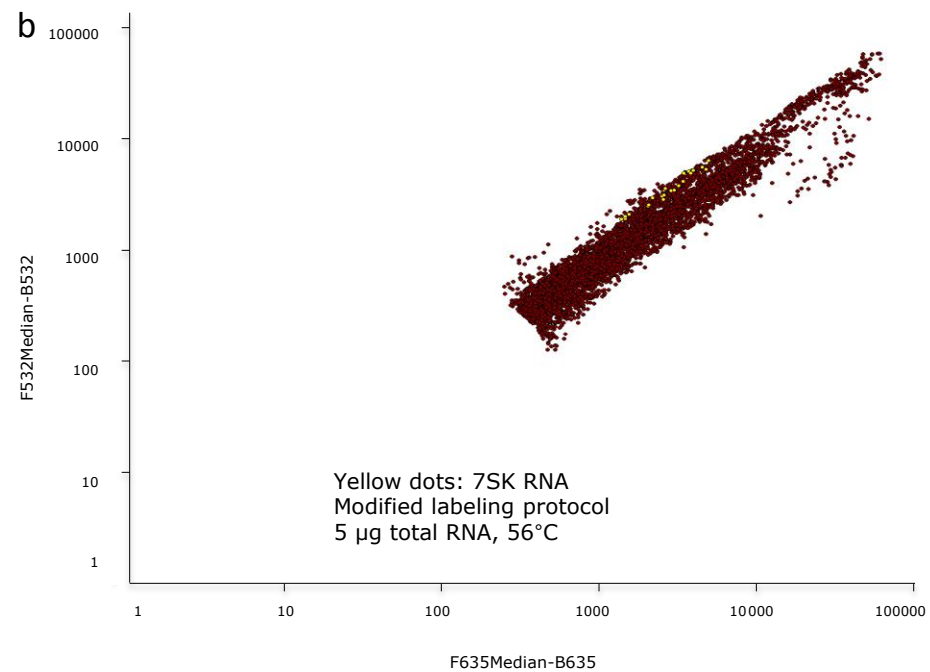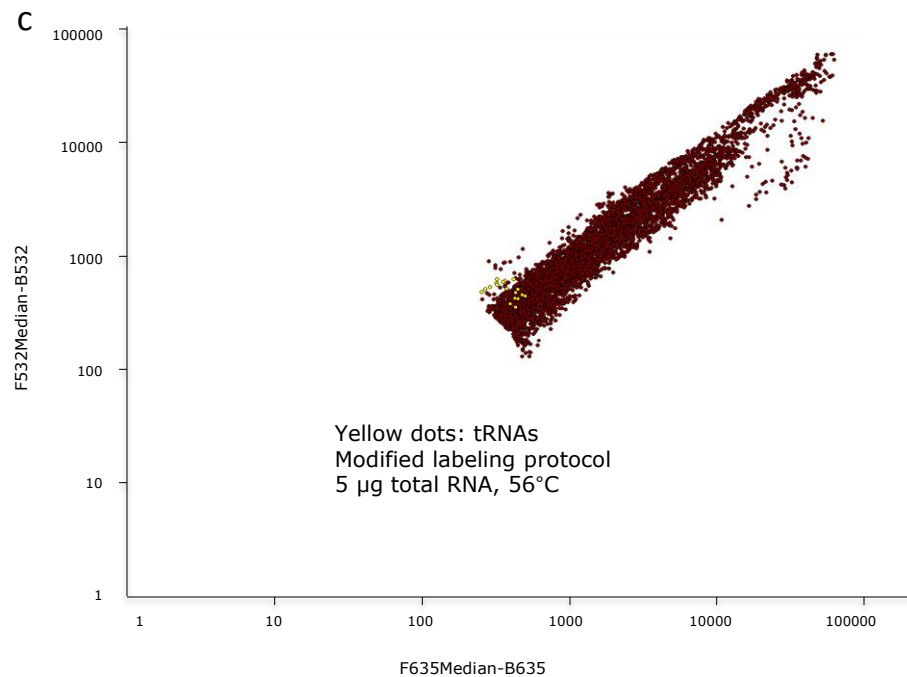

Supplementary Figure 1

| Oligo name        | Sequence (5' -- 3')                                          |
|-------------------|--------------------------------------------------------------|
| 75K_126-162       | TGCGGGGAAGGTGCTGCTCTCTGACCGAGCGCGCAGCT                       |
| 75K_126-162D1     | TGCGGGGAAGGTGCTGCTCTGACCGAGCGCGCAGCT                         |
| 75K_126-162D2     | TGCGGGGAAGGTGCTGCTCTGACCGAGCGCGCAGCT                         |
| 75K_126-162MM1    | TGCGGGGAAGGTGCTGCTCTGACCGAGCGCGCAGCT                         |
| 75K_126-162MM2    | TGCGGGGAAGGTGCTGCTCTGACCGAGCGCGCAGCT                         |
| 75K_126-162_RC    | AGCTGCGGCGCTGCTGCTGAGGAGGAGGACCTTCCCGGA                      |
| 75K_17-43         | AGCCGAATCAACCCCTGGCGATCATTGGGGGTGACAGATGTGCGACGCCA           |
| 75K_17-43MM1      | AGCCGAATCAACCCCTGGCGATCATTGGGGGTGACAGATGTGCGACGCCA           |
| 75K_17-43MM2      | AGCCGAATCAACCCCTGGCGATCATTGGGGGTGACAGATGTGCGACGCCA           |
| 75K_17-43_RC      | TGGCTGCGACATCTGTACGCCATTGATCGCCAGGGTGTATTGCGGT               |
| 75K_55-91         | AGGGGACACCCGCGCTAGCCAGCCAGATCAGCCGAATC                       |
| 75K_55-91MM1      | AGGGGACACCCGCGCTAGCCAGCCAGATCAGCCGAATC                       |
| 75K_55-91MM2      | AGGGGACACCCGCGCTAGCCAGCCAGATCAGCCGAATC                       |
| 75K_55-91_RC      | GATTGCGCTGATCTGGCTGGCTAGGCGGGTGTCCCGCT                       |
| SNORA18_4-47      | CAACGACGCTGTGGCTACTAGGGAAGCCCGCTGGGATAGACCTC                 |
| SNORA18_4-47MM1   | CAACGACGCTGTGGCTACTAGGGAAGCCCGCTGGGATAGACCTC                 |
| SNORA18_4-47MM2   | CAACGACGCTGTGGCTACTAGGGAAGCCCGCTGGGATAGACCTC                 |
| SNORA18_4-47_RC   | GAGGTCTATCCCGACGGGGCTCCCTAGTAGCCAGAGCTGTTG                   |
| SNORA18_66-112    | CCACAGACCTTACAGTCAGTCTGTGAGTCAAGTAAACCCACAAGT                |
| SNORA18_66-112MM1 | CCACAGACCTTACAGTCAGTCTGTGAGTCAAGTAAACCCACAAGT                |
| SNORA18_66-112MM2 | CCACAGACCTTACAGTCAGTCTGTGAGTCAAGTAAACCCACAAGT                |
| SNORA18_66-112_RC | ACTTGTGGTTTTACTTGACTACAGAGACTGACTGTAGGTCTGTGGG               |
| SNORA71_14-66     | GCATCTCTCTCCCTGCAGTATCAATGACGAGGACCGGAGCCACAATCACT           |
| SNORA71_14-66MM1  | GCATCTCTCTCCCTGCAGTATCAATGACGAGGACCGGAGCCACAATCACT           |
| SNORA71_14-66MM2  | GCATCTCTCTCCCTGCAGTATCAATGACGAGGACCGGAGCCACAATCACT           |
| SNORA71_14-66_RC  | AGTGATTGTGGGCTGCCGGTGCCTGTGTCATTGATGATGACGAGGAGATGC          |
| SNORA71_71-124    | AAGCACCAGGGTTTGGCAAGGACAAGTGTATCTCCAAACACGGGGAAGGCT          |
| SNORA71_71-124MM1 | AAGCACCAGGGTTTGGCAAGGACAAGTGTATCTCCAAACACGGGGAAGGCT          |
| SNORA71_71-124MM2 | AAGCACCAGGGTTTGGCAAGGACAAGTGTATCTCCAAACACGGGGAAGGCT          |
| SNORA71_71-124_RC | AGCCTTTCCCGGTGTTGGAGGATCACACTTGTCTTGCACCAACCTGTGCTT          |
| SNORD113_19-72    | GTGAACCTCAGACTCTCAGACGATAGTCATAATACAGACTCATACAGCACCC         |
| SNORD113_19-72MM1 | GTGAACCTCAGACTCTCAGACGATAGTCATAATACAGACTCATACAGCACCC         |
| SNORD113_19-72MM2 | GTGAACCTCAGACTCTCAGACGATAGTCATAATACAGACTCATACAGCACCC         |
| SNORD113_19-72_RC | GGTGCTGTATGAGTGTGTATTATGATATGCGTCTGAGAGTCTGAGTTTAC           |
| SNORD113_9-67     | CCTCAGACTCTCAGACGATAGTCATAATACAGACTCATACAGCACCCAGTCATCA      |
| SNORD113_9-67MM1  | CCTCAGACTCTCAGACGATAGTCATAATACAGACTCATACAGCACCCAGTCATCA      |
| SNORD113_9-67MM2  | CCTCAGACTCTCAGACGATAGTCATAATACAGACTCATACAGCACCCAGTCATCA      |
| SNORD113_9-67_RC  | TGATGACTGTGGGTGCTGTATGATGCTGTATTATGACTATGCGTCTGAGAGTCTGAGG   |
| SNORD55_29-75     | CGCTCAGCTCTCCAAAGTTGGGCTCCCGACGACGAGTGGGAGTGT                |
| SNORD55_29-75MM1  | CGCTCAGCTCTCCAAAGTTGGGCTCCCGACGACGAGTGGGAGTGT                |
| SNORD55_29-75MM2  | CGCTCAGCTCTCCAAAGTTGGGCTCCCGACGACGAGTGGGAGTGT                |
| SNORD55_29-75_RC  | ACACTCCGAGTGTGACGATACCCAGGTGTCTATCCG                         |
| SNORD55_3-41      | CAGTGGGAGTGTGACGATACCCAGGTGTCTATCCG                          |
| SNORD55_3-41MM1   | CAGTGGGAGTGTGACGATACCCAGGTGTCTATCCG                          |
| SNORD55_3-41MM2   | CAGTGGGAGTGTGACGATACCCAGGTGTCTATCCG                          |
| SNORD55_3-41_RC   | CGGATGATGACACTGGGTATGCTGCACACTCCGAGT                         |
| SNORD81_10-58     | CTGTCTCAAGTAATCAGTGAGAGATCCAAAGTTGGGGTGAGATCATCA             |
| SNORD81_10-58MM1  | CTGTCTCAAGTAATCAGTGAGAGATCCAAAGTTGGGGTGAGATCATCA             |
| SNORD81_10-58MM2  | CTGTCTCAAGTAATCAGTGAGAGATCCAAAGTTGGGGTGAGATCATCA             |
| SNORD81_10-58_RC  | TGATGATCTCACCCAACTTGGACTCTCTCACTGATTCTGATGACAG               |
| SNORD81_2-58      | CTGTCTCAAGTAATCAGTGAGAGATCCAAAGTTGGGGTGAGATCATCTGTCTCT       |
| SNORD81_2-58MM1   | CTGTCTCAAGTAATCAGTGAGAGATCCAAAGTTGGGGTGAGATCATCTGTCTCT       |
| SNORD81_2-58MM2   | CTGTCTCAAGTAATCAGTGAGAGATCCAAAGTTGGGGTGAGATCATCTGTCTCT       |
| SNORD81_2-58_RC   | AGGACACATGATGATCTCACCCCACTTGGACTCTCTCACTGATTACTTGACAG        |
| SNORD239_6-60     | TACATCAGAAAGCGTTTACAGTATCATTTATTCATACTGATTTCCTTCATCACA       |
| SNORD239_6-60MM1  | TACATCAGAAAGCGTTTACAGTATCATTTATTCATACTGATTTCCTTCATCACA       |
| SNORD239_6-60MM2  | TACATCAGAAAGCGTTTACAGTATCATTTATTCATACTGATTTCCTTCATCACA       |
| SNORD239_6-60_RC  | TGTGATGAAGCAATCAGTATGAATAAATGATACCTGAAACGCTTCTGATGTA         |
| IRNALys_1-59      | CTGGAACCCACGACCTGGGATTAAGAGTCCCATGCTCTACCGACTGAGCTAGCCGGGC   |
| IRNALys_1-59D1    | CTGGAACCCACGACCTGGGATTAAGAGTCCCATGCTCTACCGACTGAGCTAGCCGGGC   |
| IRNALys_1-59D2    | CTGGAACCCACGACCTGGGATTAAGAGTCCCATGCTCTACCGACTGAGCTAGCCGGGC   |
| IRNALys_1-59MM1   | CTGGAACCCACGACCTGGGATTAAGAGTCCCATGCTCTACCGACTGAGCTAGCCGGGC   |
| IRNALys_1-59MM2   | CTGGAACCCACGACCTGGGATTAAGAGTCCCATGCTCTACCGACTGAGCTAGCCGGGC   |
| IRNALys_1-59_RC   | GCCCGGCTAGCTCAGTGGTAGAGATGGGACTCTTAATCCAGGGGTGGGGTTGAG       |
| IRNALys_40-69     | CAACGTGGGGCTGAAACCCACGACCTGGG                                |
| IRNALys_40-69MM1  | CAACGTGGGGCTGAAACCCACGACCTGGG                                |
| IRNALys_40-69MM2  | CAACGTGGGGCTGAAACCCACGACCTGGG                                |
| IRNALys_40-69_RC  | CCGAGGGTGTGGGTCGAGCCACCCAGCTTG                               |
| IRNAPhe_16-75     | GGTGCCGAAACCCGGGATCGAACCCAGGGACCTTTAGATCTTCAGTCTAACGCTCTCCAA |
| IRNAPhe_16-75MM1  | GGTGCCGAAACCCGGGATCGAACCCAGGGACCTTTAGATCTTCAGTCTAACGCTCTCCAA |
| IRNAPhe_16-75MM2  | GGTGCCGAAACCCGGGATCGAACCCAGGGACCTTTAGATCTTCAGTCTAACGCTCTCCAA |
| IRNAPhe_16-75_RC  | TTGGGAGAGCGTTAGACTGAAGATCTAAAGGTCCCTGGTTCGATCCCGGGTTGGGACCC  |
| IRNAPhe_47-76     | TGGTGCCGAAACCCGGGATCGAACCCAGGG                               |
| IRNAPhe_47-76MM1  | TGGTGCCGAAACCCGGGATCGAACCCAGGG                               |
| IRNAPhe_47-76MM2  | TGGTGCCGAAACCCGGGATCGAACCCAGGG                               |
| IRNAPhe_47-76_RC  | TCCTTGGTTCGATCCCGGGTTTGGGACCA                                |

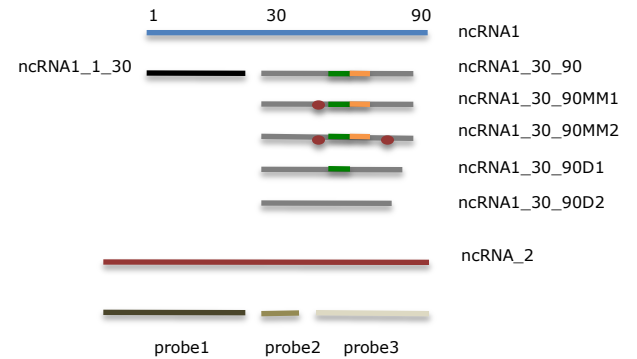

Supplementary Table 1

| UniqueID | Name              | ES vs Brain total RNA | UniqueID | Name              | ES vs Brain total RNA |
|----------|-------------------|-----------------------|----------|-------------------|-----------------------|
| 1L17     | hsa_SNORD13       | -2.0010154            | 5B7      | mmu-miR-23a       | 2.4401088             |
| 1N18     | hsa_SNORD2        | -1.9591408            | 1E9      | mmu-miR-23b       | 2.5244708             |
| 1M18     | hsa_SNORD3@       | -1.3929354            | 1F9      | mmu-miR-24        | 2.584994              |
| 5N14     | hsa-let-7a        | 3.9104207             | 1H9      | mmu-miR-26a       | 3.1850955             |
| 5C8      | hsa-miR-106a      | -2.200453             | 1K9      | mmu-miR-27b       | 2.5625648             |
| 2L11     | hsa-miR-371-5p    | -2.7227075            | 6M5      | mmu-miR-291b-5p   | -3.5358765            |
| 1D17     | hsa-miR-498       | -1.9325277            | 2I18     | mmu-miR-292-3p    | -4.7475047            |
| 1I17     | hsa-miR-503       | -1.1462102            | 2K18     | mmu-miR-293       | -4.643447             |
| 2A5      | hsa-miR-659       | -1.0401192            | 2L18     | mmu-miR-294       | -4.5158563            |
| 2H5      | hsa-miR-9*        | 3.751164              | 2M18     | mmu-miR-295       | -4.7702394            |
| 2G14     | miRPlus_17890     | -1.3811024            | 1P9      | mmu-miR-29a       | 3.3800652             |
| 2I13     | miRPlus_17952     | -1.176801             | 1L10     | mmu-miR-30a       | 3.1322336             |
| 5D2      | miRPlus_21472     | -1.5241518            | 1M10     | mmu-miR-30b       | 3.0904121             |
| 5E4      | miRPlus_27561     | -2.174772             | 1N10     | mmu-miR-30c       | 2.9647126             |
| 3E18     | mmu-let-7a        | 3.8383002             | 1O10     | mmu-miR-30d       | 3.6222904             |
| 5H14     | mmu-let-7b        | 1.044384              | 1O11     | mmu-miR-335-5p    | 2.2869596             |
| 1C1      | mmu-let-7c        | 2.6271546             | 1A12     | mmu-miR-338-3p    | 2.3757057             |
| 5D14     | mmu-let-7d        | 3.1397784             | 5N9      | mmu-miR-369-3p    | 2.4375849             |
| 1E1      | mmu-let-7e        | 1.5860898             | 5J10     | mmu-miR-374       | 1.8789672             |
| 1G1      | mmu-let-7g        | 3.562132              | 2C21     | mmu-miR-467b      | -1.3100047            |
| 1H1      | mmu-let-7i        | 4.08837               | 5H2      | mmu-miR-668       | -1.0478611            |
| 1L1      | mmu-miR-103       | 2.9407806             | 2H22     | mmu-miR-677       | -2.3486063            |
| 5G7      | mmu-miR-107       | 3.2431517             | 2I22     | mmu-miR-678       | -1.3342453            |
| 1G2      | mmu-miR-124       | 3.7746544             | 2P22     | mmu-miR-685       | -1.1779056            |
| 1H2      | mmu-miR-125a-5p   | 2.6573153             | 2D23     | mmu-miR-689       | -3.6705205            |
| 5N11     | mmu-miR-125b-5p   | 3.75356               | 2E24     | mmu-miR-706       | -2.4139588            |
| 5A14     | mmu-miR-128a/128b | 3.7520082             | 5D9      | mmu-miR-708       | 1.1890153             |
| 2E7      | mmu-miR-129-3p    | 2.9990404             | 2G5      | mmu-miR-9         | 3.8342102             |
| 1I3      | mmu-miR-138       | 3.6429393             | 5E14     | mmu-miR-9*        | 2.2085142             |
| 1A5      | mmu-miR-16        | 1.7949975             | 2N5      | mmu-miR-98        | 3.8455708             |
| 5B8      | mmu-miR-17        | -2.3353066            | 7J2      | SNORA71_14-66     | -2.1912198            |
| 1E6      | mmu-miR-191       | 1.9610482             | 7K2      | SNORA71_14-66MM1  | -2.1310618            |
| 1L6      | mmu-miR-195       | 3.7988846             | 7N2      | SNORA71_71-124    | -2.476882             |
| 1J7      | mmu-miR-200b      | 1.7533876             | 7O2      | SNORA71_71-124MM1 | -2.3021042            |
| 1F7      | mmu-miR-20a       | -2.3012671            | 7P2      | SNORA71_71-124MM2 | -2.4302258            |
| 1L8      | mmu-miR-218       | 3.9354165             | 7N3      | SNORD55_3-41      | -1.0061008            |
| 1N8      | mmu-miR-22        | 2.191882              | 1A2      | U6-snRNA-1        | -1.3984196            |
|          |                   |                       | 1B2      | U6-snRNA-2        | -1.2016013            |

Supplementary Table 2
